# Supplementary material for: PD-1 Immune Checkpoint Blockade Promotes Therapeutic Cancer Vaccine to Eradicate Lung Cancer
Source: MDPI journal article supplement (doi:10.3390/vaccines8020317), 2020-06-18
Supplement: s1 [file s1]

Figure S1

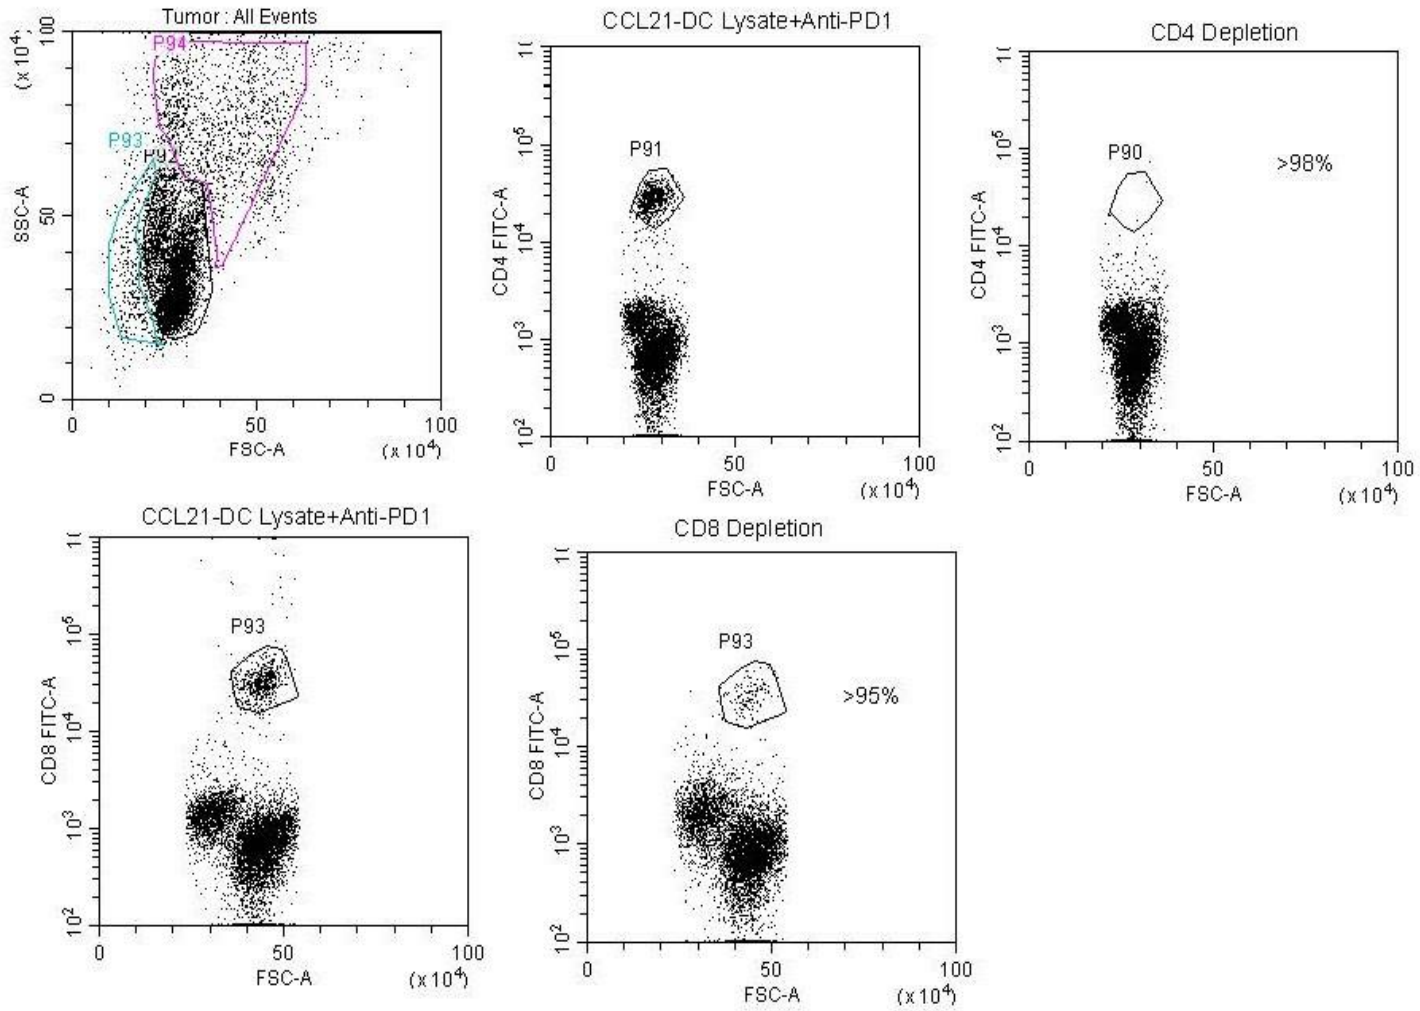

Figure S1. CD4 and CD8 T cell depletion.
